# Supplementary material
Source: publisher site journal article supplement (https://www.dovepress.com/article/533465)
Supplement: Supplementary file 1 [file Supplementary%20Material.docx]

**Appendix 1: Semi-structured interview outline**

Hello, I am XX, a researcher at XX University, and I would like to invite you to participate in a research interview on “Positive Psychological Energy”. During the process, the interviewer will ask you questions and ask you to answer them according to your own understanding. There are no right or wrong answers to the questions, it all depends on your understanding. The content of this interview will be kept completely confidential and will be used only for psychological research.

1. What do you think of positive psychological energy?

2. What do you think of when you think of positive psychological energy?

3. What do you think is the role of positive psychological energy?

4. Do you think you have positive psychological energy?

5. Do you think everyone has positive psychological energy?

-If yes, please explain how people with high positive psychological energy are like? What are people with low positive psychological energy like?

-If no, what are people with positive psychological energy like? What are people without positive psychological energy like?

6. Do you think “positive mental energy” can be transferred/influenced to others?

7. What kind of manifestation do you think positive psychological energy will have in daily behavior?

8. How do you think positive psychological energy is reflected in emotions? Can you associate any words with it?

9. What do you think is the use of positive psychological energy in the cognitive/conceptual/thinking aspects of the embodiment?

10. What is your attitude towards positive psychological energy? How do you evaluate people with positive psychological energy?

11. Do you think there are other aspects of positive psychological energy?

12. the relationship between positive psychological energy and morality, and the relationship with the law.

**Appendix 2: Positive Psychological Energy Questionnaire for College Students**

Please read carefully and decide whether the following sentences match your actual situation, and choose the appropriate option according to your actual situation. There is no right or wrong answer, and there is no need to give too much thought to each question (1=very much does not match; 2=does not match; 3=somewhat does not match; 4=not sure; 5=somewhat matches; 6=matches; 7=very much matches).

| item | very much does not match | does not match | somewhat does not match | not sure | somewhat matches | matches | very much matches |
| --- | --- | --- | --- | --- | --- | --- | --- |
| C3. I have hope for society. |  |  |  |  |  |  |  |
| C5. I believe that the collective comes before the individual. |  |  |  |  |  |  |  |
| C6. I am open-minded and easy to accept new things. |  |  |  |  |  |  |  |
| C7. I am flexible and able to think from multiple perspectives. |  |  |  |  |  |  |  |
| C9, I want things to go in the good direction. |  |  |  |  |  |  |  |
| C10: I believe that human nature is good. |  |  |  |  |  |  |  |
| C12. I have my own independent thinking about things. |  |  |  |  |  |  |  |
| C13. I will consider the interests of the whole. |  |  |  |  |  |  |  |
| C14. I have a sense of social responsibility. |  |  |  |  |  |  |  |
| C15. I am willing to assume my responsibilities. |  |  |  |  |  |  |  |
| C16. My values are adapted to the mainstream values of society. |  |  |  |  |  |  |  |
| C19. I hope to contribute to society. |  |  |  |  |  |  |  |
| C23. I will think in a positive way in the face of difficulties. |  |  |  |  |  |  |  |
| C24, I am grateful. |  |  |  |  |  |  |  |
| C25. I will be influenced by the good spiritual qualities of others or role models. |  |  |  |  |  |  |  |
| E1. More often than not, my emotions are positive. |  |  |  |  |  |  |  |
| E2. I am optimistic and cheerful. |  |  |  |  |  |  |  |
| E4, My mood is stable and calm with no major ups and downs. |  |  |  |  |  |  |  |
| E5. I am not easily affected by the negative emotions of others. |  |  |  |  |  |  |  |
| E6. I will be aware of changes in my emotions and adjust them in time. |  |  |  |  |  |  |  |
| E7. I can dissipate negative emotions on my own. |  |  |  |  |  |  |  |
| E8. emotionally, I am safe. |  |  |  |  |  |  |  |
| E10. I am content with what I have. |  |  |  |  |  |  |  |
| E11. I can feel the good in life. |  |  |  |  |  |  |  |
| E12. I can feel the kindness and warmth of others. |  |  |  |  |  |  |  |
| E13. My positive mood can motivate others. |  |  |  |  |  |  |  |
| E14. I can be motivated by the positive emotions of others. |  |  |  |  |  |  |  |
| E15. When I encounter difficulties, I can still maintain an optimistic mindset. |  |  |  |  |  |  |  |
| B2. I participate in voluntary activities. |  |  |  |  |  |  |  |
| B3. I abide by social and moral norms. |  |  |  |  |  |  |  |
| B5. I will express my goodwill to the community through my own ways. |  |  |  |  |  |  |  |
| B9. When encountering difficulties, I tend to choose to face them and actively look for solutions rather than avoiding them. |  |  |  |  |  |  |  |
| B10. I dare to express myself. |  |  |  |  |  |  |  |
| B13. I love life. |  |  |  |  |  |  |  |
| B14. I will do what interests me. |  |  |  |  |  |  |  |
| B15. I am willing to share with others. |  |  |  |  |  |  |  |
| B17. My positive behavior affects or motivates others. |  |  |  |  |  |  |  |
| B18. I treat others sincerely. |  |  |  |  |  |  |  |
| B25. I maintain good relationships. |  |  |  |  |  |  |  |
| B26. I am inclusive in my dealings with others.。 |  |  |  |  |  |  |  |
| B27. I will try my best to understand others. |  |  |  |  |  |  |  |
| B30. I am willing to give in my dealings with others. |  |  |  |  |  |  |  |
| B31. I promote virtue. |  |  |  |  |  |  |  |
| S1. I will work hard to complete my job and seek a good result. |  |  |  |  |  |  |  |
| S2. I tend to complete tasks efficiently. |  |  |  |  |  |  |  |
| S3. I have a plan for what needs to be accomplished. |  |  |  |  |  |  |  |
| S5. I am ambitious. |  |  |  |  |  |  |  |
| S6. I believe I am capable. |  |  |  |  |  |  |  |
| S7. I have a plan for my life. |  |  |  |  |  |  |  |
| S8. I value my own development. |  |  |  |  |  |  |  |
| S9. I can see the deficiencies in myself. |  |  |  |  |  |  |  |
